# Supplementary material for: Integrative taxonomy of Metrichia Ross (Trichoptera: Hydroptilidae: Ochrotrichiinae) microcaddisflies from Brazil: descriptions of twenty new species
Source: PeerJ journal article supplement (doi:10.7717/peerj.2009), 2016-05-05
Supplement: Supp4-BItree.pdf [file Supp4-BItree.pdf]

Integrative taxonomy of *Metrichia* Ross (Trichoptera: Hydroptilidae: Ochrotrichiinae) microcaddisflies from Brazil: descriptions of twenty new species

ALLAN P M SANTOS\*; DANIELA M TAKIYA & JORGE L NESSIMIAN

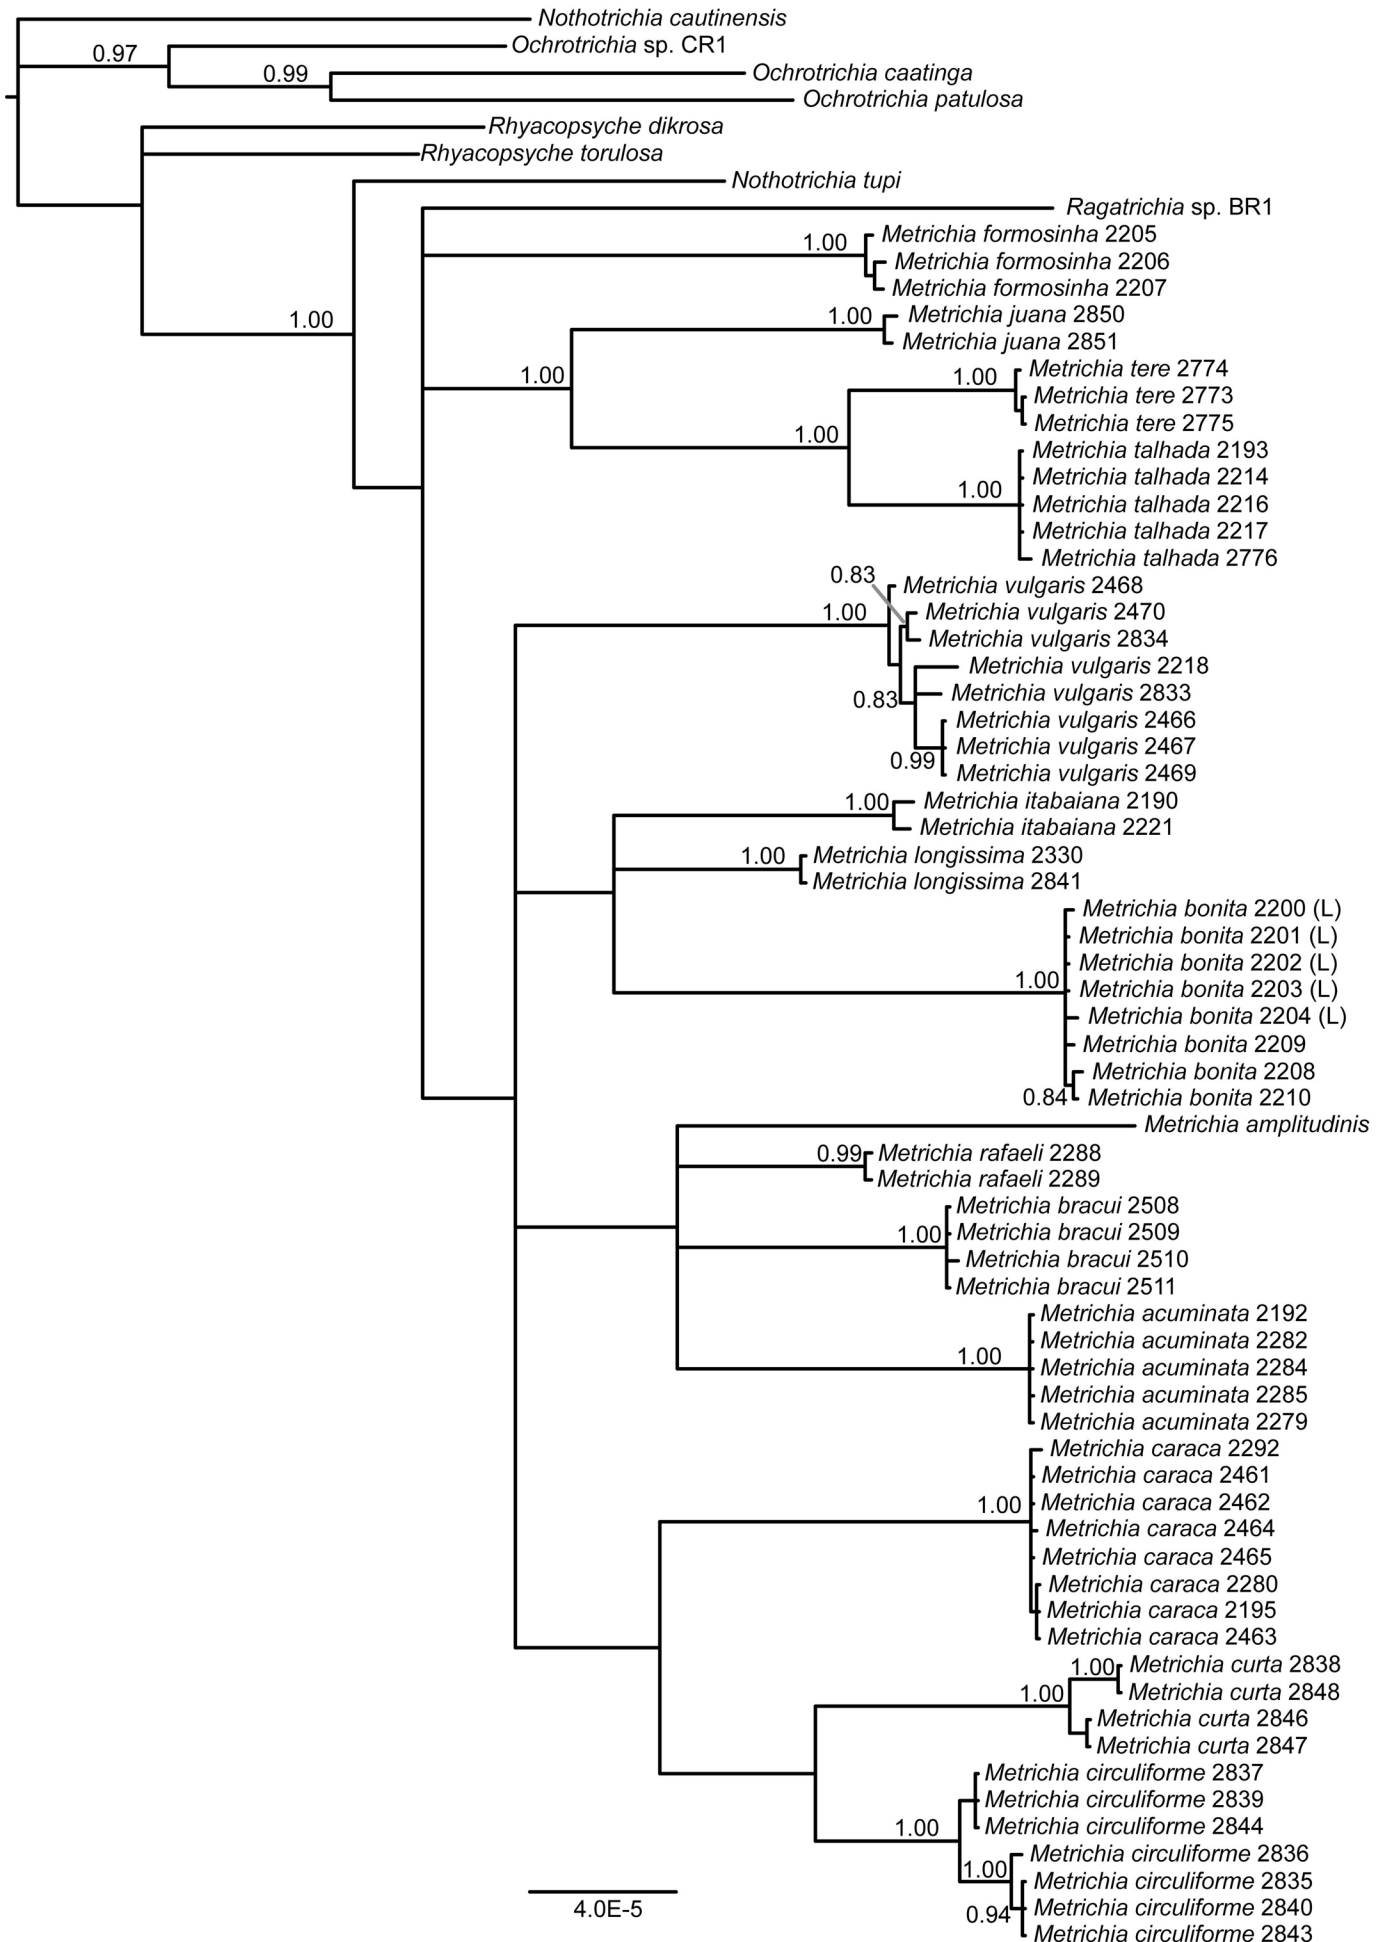

Consensus phylogram (50% majority-rule) from BI analyses of COI sequences (lnL = -5464.29). Values displayed near branches are posterior probability.
