# Supplementary material for: Integrative taxonomy of Metrichia Ross (Trichoptera: Hydroptilidae: Ochrotrichiinae) microcaddisflies from Brazil: descriptions of twenty new species
Source: PeerJ. 2016 May 5;4:e2009. doi: 10.7717/peerj.2009 (PMC4860326; doi:10.7717/peerj.2009)
Supplement: Supplemental Information 5 [file peerj-04-2009-s005.xlsx]

## Sheet: Sheet1
		ENT0057	ENT2337	ENT2199	ENT0122	ENT2277	ENT2338	ENT2279	ENT2472	ENT2473	GenBank	ENT2460	ENT2190	ENT2221	ENT2193	ENT2214	ENT2216	ENT2217	ENT2776	ENT2200	ENT2201	ENT2202	ENT2203	ENT2204	ENT2208	ENT2209	ENT2210	ENT2205	ENT2206	ENT2207	ENT2278	ENT2192	ENT2282	ENT2284	ENT2285	ENT2779	ENT2288	ENT2289	ENT2280	ENT2195	ENT2292	ENT2461	ENT2462	ENT2463	ENT2464	ENT2465	ENT2218	ENT2466	ENT2467
Oxyethira tica	ENT0057
Betrichia bispinosa	ENT2337	0.354479
Angrisanoia cebolatti	ENT2199	0.497252	0.425922
Rhyacopsyche dikrosa	ENT0122	0.369082	0.363634	0.401197
Rhyacopsyche torulosa	ENT2277	0.385511	0.520544	0.365859	0.241267
Ragatrichia sp BR1	ENT2338	0.361217	0.439293	0.329706	0.280095	0.346844
Ochrotrichia sp CR1	ENT2279	0.429253	0.414041	0.331426	0.27308	0.272759	0.361314
Ochrotrichia caatinga	ENT2472	0.395662	0.369251	0.365358	0.301512	0.351419	0.393723	0.274301
Ochrotrichia patulosa	ENT2473	0.446951	0.440805	0.455377	0.400863	0.378366	0.429253	0.372189	0.325369
Nototrichia cautinensis	GenBank	0.300902	0.339322	0.371807	0.253463	0.301512	0.330368	0.286896	0.280958	0.327196
Nototrichia tupi	ENT2460	0.467412	0.37869	0.207377	0.328027	0.385273	0.351419	0.342836	0.376923	0.460257	0.343986
M. itabaiana SE	ENT2190	0.393839	0.42258	0.353796	0.360197	0.355929	0.281533	0.361039	0.363634	0.372314	0.31742	0.263424
M. itabaiana GO	ENT2221	0.411397	0.42258	0.328226	0.351419	0.364512	0.281533	0.353004	0.363634	0.372314	0.333492	0.263424	0.0188679
M. talhada AL	ENT2193	0.377646	0.435897	0.391111	0.362233	0.364565	0.372314	0.418831	0.42258	0.398403	0.312017	0.339292	0.334442	0.334442
M. talhada AL	ENT2214	0.377646	0.435897	0.391111	0.362233	0.364565	0.372314	0.418831	0.42258	0.398403	0.312017	0.339292	0.334442	0.334442	0
M. talhada AL	ENT2216	0.377646	0.435897	0.391111	0.362233	0.364565	0.372314	0.418831	0.42258	0.398403	0.312017	0.339292	0.334442	0.334442	0	0
M. talhada AL	ENT2217	0.377646	0.435897	0.391111	0.362233	0.364565	0.372314	0.418831	0.42258	0.398403	0.312017	0.339292	0.334442	0.334442	0	0	0
M. talhada AL	ENT2776	0.377646	0.435897	0.391111	0.362233	0.364565	0.372314	0.418831	0.42258	0.398403	0.312017	0.339292	0.334442	0.334442	0	0	0	0
M. bonita larva MS	ENT2200	0.444632	0.556897	0.389161	0.405479	0.370627	0.409087	0.443281	0.44207	0.444632	0.413679	0.308369	0.239509	0.225757	0.446905	0.446905	0.446905	0.446905	0.446905
M. bonita larva MS	ENT2201	0.434531	0.556897	0.374469	0.405479	0.361544	0.409087	0.433301	0.432209	0.444632	0.413679	0.300333	0.232564	0.219084	0.446905	0.446905	0.446905	0.446905	0.446905	0.003663
M. bonita larva MS	ENT2202	0.434531	0.556897	0.374469	0.405479	0.361544	0.409087	0.433301	0.432209	0.444632	0.413679	0.300333	0.232564	0.219084	0.446905	0.446905	0.446905	0.446905	0.446905	0.003663	0
M. bonita larva MS	ENT2203	0.434531	0.556897	0.374469	0.405479	0.361544	0.409087	0.433301	0.432209	0.444632	0.413679	0.300333	0.232564	0.219084	0.446905	0.446905	0.446905	0.446905	0.446905	0.003663	0	0
M. bonita larva MS	ENT2204	0.454983	0.556897	0.360293	0.415459	0.361544	0.409087	0.433301	0.432209	0.454983	0.42378	0.292469	0.232564	0.219084	0.446905	0.446905	0.446905	0.446905	0.446905	0.0111524	0.00738007	0.00738007	0.00738007
M. bonita MS	ENT2208	0.434531	0.582354	0.389161	0.425684	0.370627	0.428811	0.453506	0.44207	0.454983	0.42378	0.31658	0.246595	0.232564	0.446905	0.446905	0.446905	0.446905	0.446905	0.0111524	0.00738007	0.00738007	0.00738007	0.0149813
M. bonita MS	ENT2209	0.398214	0.558815	0.386176	0.394133	0.341013	0.399559	0.414596	0.424753	0.388428	0.394133	0.302381	0.229665	0.222538	0.408333	0.408333	0.408333	0.408333	0.408333	0.0078125	0.00387597	0.00387597	0.00387597	0.011811	0.011811
M. bonita MS	ENT2210	0.408021	0.538965	0.396125	0.413389	0.320815	0.406526	0.423474	0.423474	0.377606	0.40258	0.305694	0.217058	0.209976	0.408814	0.408814	0.408814	0.408814	0.408814	0.00803213	0.00398406	0.00398406	0.00398406	0.0121457	0.00398406	0.00803213
M. formosinha MS	ENT2205	0.45687	0.461205	0.410567	0.338721	0.332083	0.414041	0.361544	0.465593	0.391222	0.328264	0.342836	0.339322	0.355929	0.249251	0.249251	0.249251	0.249251	0.249251	0.383377	0.383377	0.383377	0.383377	0.393121	0.393121	0.33631	0.33461
M. formosinha MS	ENT2206	0.481681	0.47672	0.413522	0.356365	0.350304	0.427224	0.381241	0.481887	0.415179	0.354866	0.361229	0.365816	0.374735	0.257179	0.257179	0.257179	0.257179	0.257179	0.404762	0.404762	0.404762	0.404762	0.415179	0.415179	0.355183	0.354134	0.0075188
M. formosinha MS	ENT2207	0.466731	0.471684	0.395607	0.346844	0.332083	0.414041	0.379923	0.476471	0.411185	0.345242	0.360197	0.347534	0.364512	0.263424	0.263424	0.263424	0.263424	0.263424	0.393121	0.393121	0.393121	0.393121	0.403101	0.403101	0.345633	0.344251	0.00738007	0.0075188
M. amplitudinis Costa Rica	ENT2278	0.449386	0.511337	0.308237	0.405831	0.42326	0.411444	0.411258	0.413287	0.406291	0.371321	0.306226	0.282094	0.299661	0.305142	0.305142	0.305142	0.305142	0.305142	0.31968	0.31968	0.31968	0.31968	0.31968	0.310226	0.342868	0.32822	0.321378	0.321511	0.311806
M. acuminata AL	ENT2192	0.406658	0.503032	0.362369	0.384784	0.328264	0.387468	0.318195	0.333492	0.379923	0.325369	0.409163	0.269055	0.299221	0.312017	0.312017	0.312017	0.312017	0.312017	0.35402	0.35402	0.35402	0.35402	0.35402	0.336659	0.324441	0.304443	0.277232	0.300205	0.28477	0.302469
M. acuminata AL	ENT2282	0.406658	0.503032	0.362369	0.384784	0.328264	0.387468	0.318195	0.333492	0.379923	0.325369	0.409163	0.269055	0.299221	0.312017	0.312017	0.312017	0.312017	0.312017	0.35402	0.35402	0.35402	0.35402	0.35402	0.336659	0.324441	0.304443	0.277232	0.300205	0.28477	0.302469	0
M. acuminata AL	ENT2284	0.399604	0.494894	0.362369	0.379036	0.322841	0.381502	0.31275	0.327961	0.382073	0.327089	0.403416	0.263928	0.293984	0.306653	0.306653	0.306653	0.306653	0.306653	0.35597	0.35597	0.35597	0.35597	0.35597	0.338476	0.326275	0.306176	0.278641	0.301802	0.286231	0.302469	0	0
M. acuminata AL	ENT2285	0.406658	0.503032	0.362369	0.384784	0.328264	0.387468	0.318195	0.333492	0.379923	0.325369	0.409163	0.269055	0.299221	0.312017	0.312017	0.312017	0.312017	0.312017	0.35402	0.35402	0.35402	0.35402	0.35402	0.336659	0.324441	0.304443	0.277232	0.300205	0.28477	0.302469	0	0	0
M. acuminata AL	ENT2779	0.406658	0.503032	0.362369	0.384784	0.328264	0.387468	0.318195	0.333492	0.379923	0.325369	0.409163	0.269055	0.299221	0.312017	0.312017	0.312017	0.312017	0.312017	0.35402	0.35402	0.35402	0.35402	0.35402	0.336659	0.324441	0.304443	0.277232	0.300205	0.28477	0.302469	0	0	0	0
M. rafaeli CE	ENT2288	0.470387	0.504744	0.317343	0.376923	0.332083	0.348338	0.350282	0.304153	0.400863	0.314103	0.268351	0.206122	0.193649	0.333492	0.333492	0.333492	0.333492	0.333492	0.278191	0.270731	0.270731	0.270731	0.270731	0.278191	0.278826	0.274306	0.263424	0.277718	0.270731	0.278421	0.2368	0.2368	0.237981	0.2368	0.2368
M. rafaeli CE	ENT2289	0.480997	0.51634	0.329706	0.36784	0.323595	0.340036	0.341794	0.312017	0.410492	0.322315	0.275583	0.21254	0.199826	0.341794	0.341794	0.341794	0.341794	0.341794	0.285809	0.278191	0.278191	0.278191	0.278191	0.285809	0.286941	0.282567	0.256266	0.270159	0.263424	0.28731	0.229714	0.229714	0.230848	0.229714	0.229714	0.003663
M. caraca MG/RPPN	ENT2280	0.449515	0.484897	0.306694	0.391222	0.34807	0.413679	0.381593	0.395662	0.45345	0.377536	0.335498	0.315293	0.323595	0.306068	0.306068	0.306068	0.306068	0.306068	0.335294	0.335294	0.335294	0.335294	0.326314	0.335294	0.323311	0.312273	0.28477	0.300205	0.292469	0.285833	0.223595	0.223595	0.224666	0.223595	0.223595	0.306068	0.298203
M. caraca MG/RPPN	ENT2195	0.449515	0.484897	0.306694	0.391222	0.34807	0.413679	0.381593	0.395662	0.45345	0.377536	0.335498	0.315293	0.323595	0.306068	0.306068	0.306068	0.306068	0.306068	0.335294	0.335294	0.335294	0.335294	0.326314	0.335294	0.323311	0.312273	0.28477	0.300205	0.292469	0.285833	0.223595	0.223595	0.224666	0.223595	0.223595	0.306068	0.298203	0
M. caraca MG/PNSC	ENT2292	0.449515	0.508706	0.318856	0.381593	0.339292	0.413679	0.372189	0.395662	0.442707	0.358725	0.319073	0.315293	0.323595	0.290504	0.290504	0.290504	0.290504	0.290504	0.308953	0.308953	0.308953	0.308953	0.300559	0.308953	0.295993	0.28472	0.277232	0.29223	0.28477	0.268476	0.217115	0.217115	0.218146	0.217115	0.217115	0.306068	0.298203	0.0111524	0.0111524
M. caraca MG/RPPN	ENT2461	0.460257	0.496645	0.318856	0.391222	0.339292	0.413679	0.372189	0.404745	0.442707	0.368021	0.327196	0.30717	0.315293	0.298203	0.298203	0.298203	0.298203	0.298203	0.326314	0.326314	0.326314	0.326314	0.317536	0.326314	0.313988	0.302866	0.28477	0.300205	0.292469	0.285833	0.217115	0.217115	0.218146	0.217115	0.217115	0.306068	0.298203	0.003663	0.003663	0.00738007
M. caraca MG/RPPN	ENT2462	0.460257	0.496645	0.318856	0.391222	0.339292	0.413679	0.372189	0.404745	0.442707	0.368021	0.327196	0.30717	0.315293	0.298203	0.298203	0.298203	0.298203	0.298203	0.326314	0.326314	0.326314	0.326314	0.317536	0.326314	0.313988	0.302866	0.28477	0.300205	0.292469	0.285833	0.217115	0.217115	0.218146	0.217115	0.217115	0.306068	0.298203	0.003663	0.003663	0.00738007	0
M. caraca MG/RPPN	ENT2463	0.449515	0.484897	0.306694	0.391222	0.34807	0.413679	0.381593	0.395662	0.45345	0.377536	0.335498	0.315293	0.323595	0.306068	0.306068	0.306068	0.306068	0.306068	0.335294	0.335294	0.335294	0.335294	0.326314	0.335294	0.323311	0.312273	0.28477	0.300205	0.292469	0.285833	0.223595	0.223595	0.224666	0.223595	0.223595	0.306068	0.298203	0	0	0.0111524	0.003663	0.003663
M. caraca MG/RPPN	ENT2464	0.460257	0.496645	0.318856	0.391222	0.339292	0.413679	0.372189	0.404745	0.442707	0.368021	0.327196	0.30717	0.315293	0.298203	0.298203	0.298203	0.298203	0.298203	0.326314	0.326314	0.326314	0.326314	0.317536	0.326314	0.313988	0.302866	0.28477	0.300205	0.292469	0.285833	0.217115	0.217115	0.218146	0.217115	0.217115	0.306068	0.298203	0.003663	0.003663	0.00738007	0	0	0.003663
M. caraca MG/RPPN	ENT2465	0.460257	0.496645	0.318856	0.391222	0.339292	0.413679	0.372189	0.404745	0.442707	0.368021	0.327196	0.30717	0.315293	0.298203	0.298203	0.298203	0.298203	0.298203	0.326314	0.326314	0.326314	0.326314	0.317536	0.326314	0.313988	0.302866	0.28477	0.300205	0.292469	0.285833	0.217115	0.217115	0.218146	0.217115	0.217115	0.306068	0.298203	0.003663	0.003663	0.00738007	0	0	0.003663	0
M. vulgaris GO	ENT2218	0.397362	0.438322	0.395607	0.375596	0.400863	0.391222	0.391458	0.485744	0.425684	0.352666	0.343986	0.309662	0.317964	0.432145	0.432145	0.432145	0.432145	0.432145	0.437073	0.437073	0.437073	0.437073	0.426195	0.459677	0.398233	0.410285	0.369177	0.390923	0.387771	0.373133	0.324455	0.324455	0.326235	0.324455	0.324455	0.351316	0.342336	0.317964	0.317964	0.317964	0.317964	0.317964	0.317964	0.317964	0.317964
M. vulgaris MG	ENT2466	0.395662	0.407261	0.395607	0.384784	0.394189	0.391222	0.364512	0.47836	0.376923	0.364565	0.335498	0.301539	0.301539	0.381593	0.381593	0.381593	0.381593	0.381593	0.421535	0.421535	0.421535	0.421535	0.421535	0.432145	0.383144	0.393813	0.363	0.384682	0.381593	0.366429	0.298985	0.298985	0.300573	0.298985	0.298985	0.319444	0.31105	0.317964	0.317964	0.317964	0.317964	0.317964	0.317964	0.317964	0.317964	0.0471683
M. vulgaris MG	ENT2467	0.395662	0.407261	0.395607	0.384784	0.394189	0.391222	0.364512	0.47836	0.376923	0.364565	0.335498	0.301539	0.301539	0.381593	0.381593	0.381593	0.381593	0.381593	0.421535	0.421535	0.421535	0.421535	0.421535	0.432145	0.383144	0.393813	0.363	0.384682	0.381593	0.366429	0.298985	0.298985	0.300573	0.298985	0.298985	0.319444	0.31105	0.317964	0.317964	0.317964	0.317964	0.317964	0.317964	0.317964	0.317964	0.0471683	0
M. vulgaris MG	ENT2468	0.37869	0.405479	0.355712	0.383468	0.374384	0.370627	0.381192	0.444632	0.357838	0.336659	0.31033	0.269849	0.277232	0.389439	0.389439	0.389439	0.389439	0.389439	0.373861	0.373861	0.373861	0.373861	0.364565	0.383377	0.355183	0.344251	0.335498	0.354866	0.352666	0.354135	0.314107	0.314107	0.315802	0.314107	0.314107	0.285809	0.29359	0.308369	0.308369	0.308369	0.308369	0.308369	0.308369	0.308369	0.308369	0.0431701	0.0347772	0.0347772
M. vulgaris MG	ENT2469	0.395662	0.407261	0.395607	0.384784	0.394189	0.391222	0.364512	0.47836	0.376923	0.364565	0.335498	0.301539	0.301539	0.381593	0.381593	0.381593	0.381593	0.381593	0.421535	0.421535	0.421535	0.421535	0.421535	0.432145	0.383144	0.393813	0.363	0.384682	0.381593	0.366429	0.298985	0.298985	0.300573	0.298985	0.298985	0.319444	0.31105	0.317964	0.317964	0.317964	0.317964	0.317964	0.317964	0.317964	0.317964	0.0471683	0	0
M. vulgaris MG	ENT2470	0.387468	0.425684	0.383575	0.383468	0.412023	0.389439	0.399571	0.454983	0.375596	0.35402	0.334442	0.292469	0.300333	0.389439	0.389439	0.389439	0.389439	0.389439	0.413326	0.413326	0.413326	0.413326	0.403101	0.423805	0.375	0.385334	0.352666	0.373336	0.370627	0.334244	0.331468	0.331468	0.333296	0.331468	0.331468	0.317964	0.326452	0.31658	0.31658	0.31658	0.31658	0.31658	0.31658	0.31658	0.31658	0.0347772	0.0266407	0.0266407
M. vulgaris RJ	ENT2833	0.387468	0.425684	0.413503	0.365506	0.392764	0.370627	0.381192	0.454983	0.366616	0.35402	0.342836	0.292469	0.300333	0.389439	0.389439	0.389439	0.389439	0.389439	0.413326	0.413326	0.413326	0.413326	0.403101	0.403101	0.375	0.364269	0.335498	0.354866	0.352666	0.334244	0.297501	0.297501	0.299072	0.297501	0.297501	0.317964	0.309662	0.300333	0.300333	0.300333	0.300333	0.300333	0.300333	0.300333	0.300333	0.0347772	0.0266407	0.0266407
M. vulgaris RJ	ENT2834	0.396448	0.405479	0.369399	0.392764	0.422003	0.389439	0.390275	0.465593	0.375596	0.35402	0.334442	0.28477	0.292469	0.379923	0.379923	0.379923	0.379923	0.379923	0.403101	0.403101	0.403101	0.403101	0.393121	0.413326	0.385285	0.374666	0.361544	0.382902	0.379923	0.334244	0.359042	0.359042	0.361089	0.359042	0.359042	0.326452	0.335132	0.333558	0.333558	0.333558	0.333558	0.333558	0.333558	0.333558	0.333558	0.0474664	0.0389409	0.0389409
M. bracui RJ	ENT2508	0.555085	0.561057	0.21362	0.372314	0.38728	0.395735	0.368021	0.451415	0.434131	0.363	0.314103	0.308369	0.300333	0.409163	0.409163	0.409163	0.409163	0.409163	0.393121	0.383377	0.383377	0.383377	0.383377	0.393121	0.372987	0.380806	0.370627	0.390923	0.389439	0.34335	0.26121	0.26121	0.255103	0.26121	0.26121	0.242785	0.250092	0.314103	0.314103	0.314103	0.322315	0.322315	0.314103	0.322315	0.322315	0.273903	0.253827	0.253827
M. bracui RJ	ENT2509	0.555085	0.561057	0.21362	0.372314	0.38728	0.395735	0.368021	0.451415	0.434131	0.363	0.314103	0.308369	0.300333	0.409163	0.409163	0.409163	0.409163	0.409163	0.393121	0.383377	0.383377	0.383377	0.383377	0.393121	0.372987	0.380806	0.370627	0.390923	0.389439	0.34335	0.26121	0.26121	0.255103	0.26121	0.26121	0.242785	0.250092	0.314103	0.314103	0.314103	0.322315	0.322315	0.314103	0.322315	0.322315	0.273903	0.253827	0.253827
M. bracui RJ	ENT2510	0.567472	0.548502	0.223264	0.363634	0.377536	0.405479	0.358725	0.440805	0.42378	0.35402	0.322315	0.31658	0.308369	0.419388	0.419388	0.419388	0.419388	0.419388	0.403101	0.393121	0.393121	0.393121	0.393121	0.403101	0.383144	0.391474	0.379923	0.400841	0.399183	0.353825	0.268749	0.268749	0.262536	0.268749	0.268749	0.250092	0.257552	0.322315	0.322315	0.322315	0.330709	0.330709	0.322315	0.330709	0.330709	0.281601	0.26121	0.26121
M. bracui RJ	ENT2511	0.555085	0.561057	0.21362	0.372314	0.38728	0.395735	0.368021	0.451415	0.434131	0.363	0.314103	0.308369	0.300333	0.409163	0.409163	0.409163	0.409163	0.409163	0.393121	0.383377	0.383377	0.383377	0.383377	0.393121	0.372987	0.380806	0.370627	0.390923	0.389439	0.34335	0.26121	0.26121	0.255103	0.26121	0.26121	0.242785	0.250092	0.314103	0.314103	0.314103	0.322315	0.322315	0.314103	0.322315	0.322315	0.273903	0.253827	0.253827
M. tere RJ	ENT2773	0.474728	0.470387	0.349587	0.432209	0.387771	0.407808	0.413175	0.429777	0.425917	0.402279	0.361544	0.311124	0.311124	0.125917	0.125917	0.125917	0.125917	0.125917	0.407261	0.407261	0.407261	0.407261	0.3974	0.427713	0.408333	0.387195	0.269849	0.277718	0.28477	0.34824	0.316183	0.316183	0.310652	0.316183	0.316183	0.316749	0.324613	0.352666	0.352666	0.335498	0.343986	0.343986	0.352666	0.343986	0.343986	0.418831	0.446122	0.446122
M. tere RJ	ENT2774	0.474728	0.470387	0.349587	0.432209	0.387771	0.407808	0.413175	0.429777	0.425917	0.402279	0.361544	0.311124	0.311124	0.125917	0.125917	0.125917	0.125917	0.125917	0.407261	0.407261	0.407261	0.407261	0.3974	0.427713	0.408333	0.387195	0.269849	0.277718	0.28477	0.34824	0.316183	0.316183	0.310652	0.316183	0.316183	0.316749	0.324613	0.352666	0.352666	0.335498	0.343986	0.343986	0.352666	0.343986	0.343986	0.418831	0.446122	0.446122
M. tere RJ	ENT2775	0.474728	0.470387	0.349587	0.432209	0.387771	0.407808	0.413175	0.429777	0.425917	0.402279	0.361544	0.311124	0.311124	0.125917	0.125917	0.125917	0.125917	0.125917	0.407261	0.407261	0.407261	0.407261	0.3974	0.427713	0.408333	0.387195	0.269849	0.277718	0.28477	0.34824	0.316183	0.316183	0.310652	0.316183	0.316183	0.316749	0.324613	0.352666	0.352666	0.335498	0.343986	0.343986	0.352666	0.343986	0.343986	0.418831	0.446122	0.446122
M. longissima RJ/PARNASO	ENT2330	0.489661	0.506614	0.317343	0.44775	0.322315	0.384784	0.360197	0.475767	0.425917	0.425684	0.29144	0.228612	0.221737	0.324975	0.324975	0.324975	0.324975	0.324975	0.314107	0.305713	0.305713	0.305713	0.305713	0.32269	0.291022	0.286714	0.391458	0.404162	0.400863	0.353825	0.305062	0.305062	0.29975	0.305062	0.305062	0.31105	0.302838	0.293919	0.293919	0.293919	0.285796	0.285796	0.293919	0.285796	0.285796	0.30717	0.248007	0.248007
M. longissima RJ/PNI	ENT2841	0.489661	0.518362	0.329706	0.437399	0.314103	0.375596	0.351419	0.464466	0.416174	0.436163	0.299221	0.221737	0.214997	0.333558	0.333558	0.333558	0.333558	0.333558	0.305713	0.297501	0.297501	0.297501	0.297501	0.314107	0.282628	0.278162	0.38227	0.394481	0.391458	0.34335	0.305062	0.305062	0.29975	0.305062	0.305062	0.302838	0.294803	0.302222	0.302222	0.302222	0.293919	0.293919	0.302222	0.293919	0.293919	0.299221	0.254882	0.254882
M. circuliforme RJ	ENT2835	0.402519	0.396448	0.207377	0.290504	0.351316	0.274301	0.298203	0.3794	0.431257	0.319073	0.223595	0.278191	0.270731	0.330709	0.330709	0.330709	0.330709	0.330709	0.319444	0.31105	0.31105	0.31105	0.302838	0.328027	0.288202	0.317604	0.28477	0.29223	0.28477	0.249356	0.327196	0.327196	0.321747	0.327196	0.327196	0.258981	0.266364	0.29359	0.29359	0.285809	0.29359	0.29359	0.29359	0.29359	0.29359	0.278191	0.299221	0.299221
M. circuliforme RJ	ENT2836	0.393839	0.387468	0.197733	0.282966	0.360505	0.281533	0.290504	0.370721	0.441	0.311124	0.217115	0.270731	0.263424	0.322315	0.322315	0.322315	0.322315	0.322315	0.31105	0.302838	0.302838	0.302838	0.294803	0.319444	0.279995	0.308532	0.277232	0.284425	0.277232	0.257258	0.319073	0.319073	0.313654	0.319073	0.319073	0.251749	0.258981	0.285809	0.285809	0.278191	0.285809	0.285809	0.285809	0.285809	0.285809	0.270731	0.29144	0.29144
M. circuliforme RJ	ENT2837	0.402519	0.405636	0.217309	0.312017	0.324975	0.282966	0.262617	0.355146	0.421741	0.341794	0.21187	0.248007	0.248007	0.35705	0.35705	0.35705	0.35705	0.35705	0.27924	0.271701	0.271701	0.271701	0.27924	0.286939	0.264121	0.282567	0.290504	0.306101	0.290504	0.220391	0.319073	0.319073	0.313654	0.319073	0.319073	0.257086	0.264318	0.288158	0.288158	0.280377	0.288158	0.288158	0.288158	0.288158	0.288158	0.263424	0.29144	0.29144
M. circuliforme RJ	ENT2839	0.402519	0.405636	0.217309	0.312017	0.324975	0.282966	0.262617	0.355146	0.421741	0.341794	0.21187	0.248007	0.248007	0.35705	0.35705	0.35705	0.35705	0.35705	0.27924	0.271701	0.271701	0.271701	0.27924	0.286939	0.264121	0.282567	0.290504	0.306101	0.290504	0.220391	0.319073	0.319073	0.313654	0.319073	0.319073	0.257086	0.264318	0.288158	0.288158	0.280377	0.288158	0.288158	0.288158	0.288158	0.288158	0.263424	0.29144	0.29144
M. circuliforme RJ	ENT2840	0.402519	0.396448	0.207377	0.290504	0.351316	0.274301	0.298203	0.3794	0.431257	0.319073	0.223595	0.278191	0.270731	0.330709	0.330709	0.330709	0.330709	0.330709	0.319444	0.31105	0.31105	0.31105	0.302838	0.328027	0.288202	0.317604	0.28477	0.29223	0.28477	0.249356	0.327196	0.327196	0.321747	0.327196	0.327196	0.258981	0.266364	0.29359	0.29359	0.285809	0.29359	0.29359	0.29359	0.29359	0.29359	0.278191	0.299221	0.299221
M. circuliforme RJ	ENT2843	0.402519	0.396448	0.207377	0.290504	0.351316	0.274301	0.298203	0.3794	0.431257	0.319073	0.223595	0.278191	0.270731	0.330709	0.330709	0.330709	0.330709	0.330709	0.319444	0.31105	0.31105	0.31105	0.302838	0.328027	0.288202	0.317604	0.28477	0.29223	0.28477	0.249356	0.327196	0.327196	0.321747	0.327196	0.327196	0.258981	0.266364	0.29359	0.29359	0.285809	0.29359	0.29359	0.29359	0.29359	0.29359	0.278191	0.299221	0.299221
M. circuliforme RJ	ENT2844	0.402519	0.405636	0.217309	0.312017	0.324975	0.282966	0.262617	0.355146	0.421741	0.341794	0.21187	0.248007	0.248007	0.35705	0.35705	0.35705	0.35705	0.35705	0.27924	0.271701	0.271701	0.271701	0.27924	0.286939	0.264121	0.282567	0.290504	0.306101	0.290504	0.220391	0.319073	0.319073	0.313654	0.319073	0.319073	0.257086	0.264318	0.288158	0.288158	0.280377	0.288158	0.288158	0.288158	0.288158	0.288158	0.263424	0.29144	0.29144
M. curta RJ	ENT2838	0.404745	0.371457	0.264854	0.298203	0.357838	0.332648	0.312017	0.388278	0.3794	0.331913	0.303343	0.266784	0.253169	0.391458	0.391458	0.391458	0.391458	0.391458	0.262617	0.25553	0.25553	0.25553	0.248586	0.269849	0.240814	0.243056	0.347534	0.357955	0.355929	0.313074	0.325369	0.325369	0.327089	0.325369	0.325369	0.282966	0.275583	0.254988	0.254988	0.247681	0.254988	0.254988	0.254988	0.254988	0.254988	0.288158	0.29359	0.29359
M. curta RJ	ENT2846	0.386229	0.372314	0.255242	0.299221	0.358962	0.341794	0.313011	0.396448	0.387468	0.30905	0.304153	0.267214	0.253463	0.363634	0.363634	0.363634	0.363634	0.363634	0.263424	0.256266	0.256266	0.256266	0.249251	0.256266	0.248093	0.250611	0.340036	0.357955	0.348338	0.305142	0.302632	0.302632	0.304195	0.302632	0.302632	0.276362	0.269055	0.227584	0.227584	0.220777	0.227584	0.227584	0.227584	0.227584	0.227584	0.289466	0.271701	0.271701
M. curta RJ	ENT2847	0.386229	0.372314	0.255242	0.299221	0.358962	0.341794	0.313011	0.396448	0.387468	0.30905	0.304153	0.267214	0.253463	0.363634	0.363634	0.363634	0.363634	0.363634	0.263424	0.256266	0.256266	0.256266	0.249251	0.256266	0.248093	0.250611	0.340036	0.357955	0.348338	0.305142	0.302632	0.302632	0.304195	0.302632	0.302632	0.276362	0.269055	0.227584	0.227584	0.220777	0.227584	0.227584	0.227584	0.227584	0.227584	0.289466	0.271701	0.271701
M. curta RJ	ENT2848	0.404745	0.371457	0.264854	0.298203	0.357838	0.332648	0.312017	0.388278	0.3794	0.331913	0.303343	0.266784	0.253169	0.391458	0.391458	0.391458	0.391458	0.391458	0.262617	0.25553	0.25553	0.25553	0.248586	0.269849	0.240814	0.243056	0.347534	0.357955	0.355929	0.313074	0.325369	0.325369	0.327089	0.325369	0.325369	0.282966	0.275583	0.254988	0.254988	0.247681	0.254988	0.254988	0.254988	0.254988	0.254988	0.288158	0.29359	0.29359
M. juana Costa Rica	ENT2850	0.415041	0.463985	0.352134	0.309639	0.346604	0.372314	0.381192	0.37329	0.415041	0.32623	0.351316	0.316749	0.324613	0.242785	0.242785	0.242785	0.242785	0.242785	0.368021	0.368021	0.368021	0.368021	0.377536	0.38728	0.328755	0.344251	0.299221	0.31669	0.30717	0.344062	0.345242	0.345242	0.339756	0.345242	0.345242	0.299221	0.30717	0.395134	0.395134	0.366239	0.385273	0.385273	0.395134	0.385273	0.385273	0.384784	0.403818	0.403818
M. juana Costa Rica	ENT2851	0.415041	0.453506	0.339352	0.309639	0.355482	0.372314	0.390275	0.355929	0.434531	0.334442	0.360505	0.324613	0.332648	0.257552	0.257552	0.257552	0.257552	0.257552	0.377536	0.377536	0.377536	0.377536	0.38728	0.39726	0.337967	0.354134	0.299221	0.31669	0.30717	0.344062	0.35402	0.35402	0.348503	0.35402	0.35402	0.299221	0.30717	0.385273	0.385273	0.375644	0.395134	0.395134	0.385273	0.395134	0.395134	0.384784	0.403818	0.403818
[truncated: 27 more columns]
